# Supplementary material
Source: Springer Nature journal article supplement (https://www.springermedizin.de/resource/supplementary/13058_2011_2971_MOESM10_ESM.pdf/9702956)

A

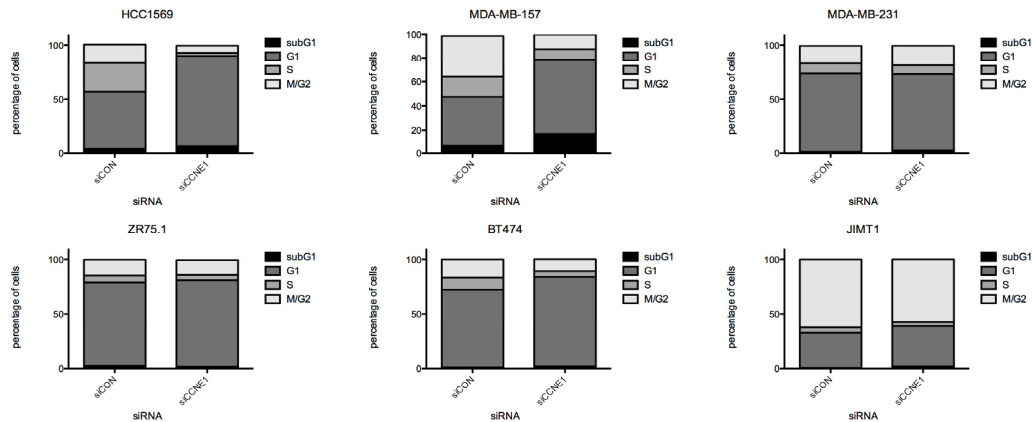

B

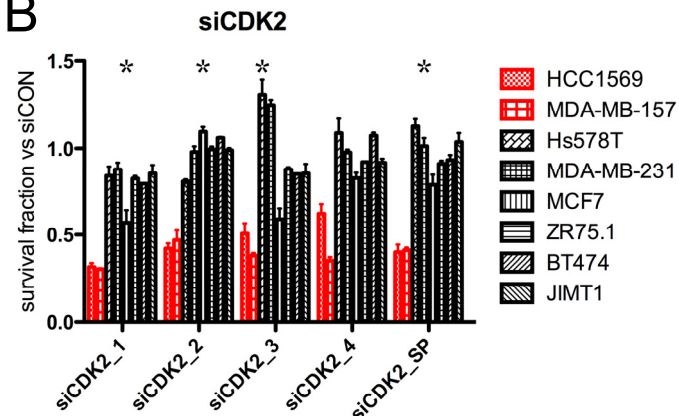

C

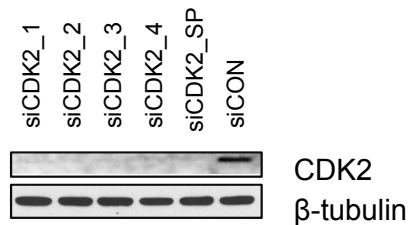

D

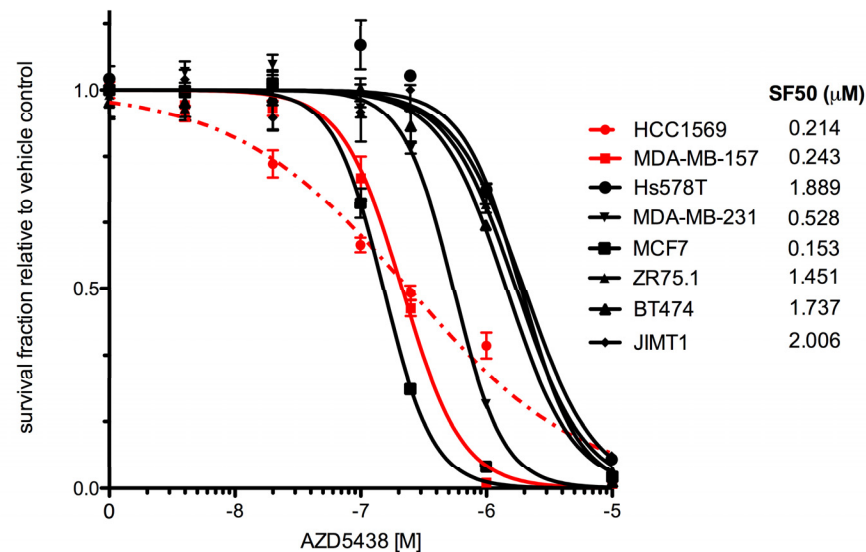

Supplement: MOESM10 [file 9702956]
